# Supplementary material for: Second harmonic generation from an individual all-dielectric nanoparticle: resonance enhancement versus particle geometry
Source: Royal Society of Chemistry journal article supplement (doi:10.1039/c6tc01635a), 2016-01-01
Supplement: c6tc01635a1.pdf [file c6tc01635a1.pdf]

## Supporting information for

### **Second harmonic generation from an individual all-dielectric nanoparticle: resonance enhancement *versus* particle geometry**

C. R. Ma, J. H. Yan, P. Liu, Y. M. Wei G. W. Yang\*

*State Key Laboratory of Optoelectronic Materials and Technologies, Nanotechnology  
Research Center, School of Materials Science & Engineering, Sun Yat-sen University,  
Guangzhou 510275, Guangdong, P. R. China*

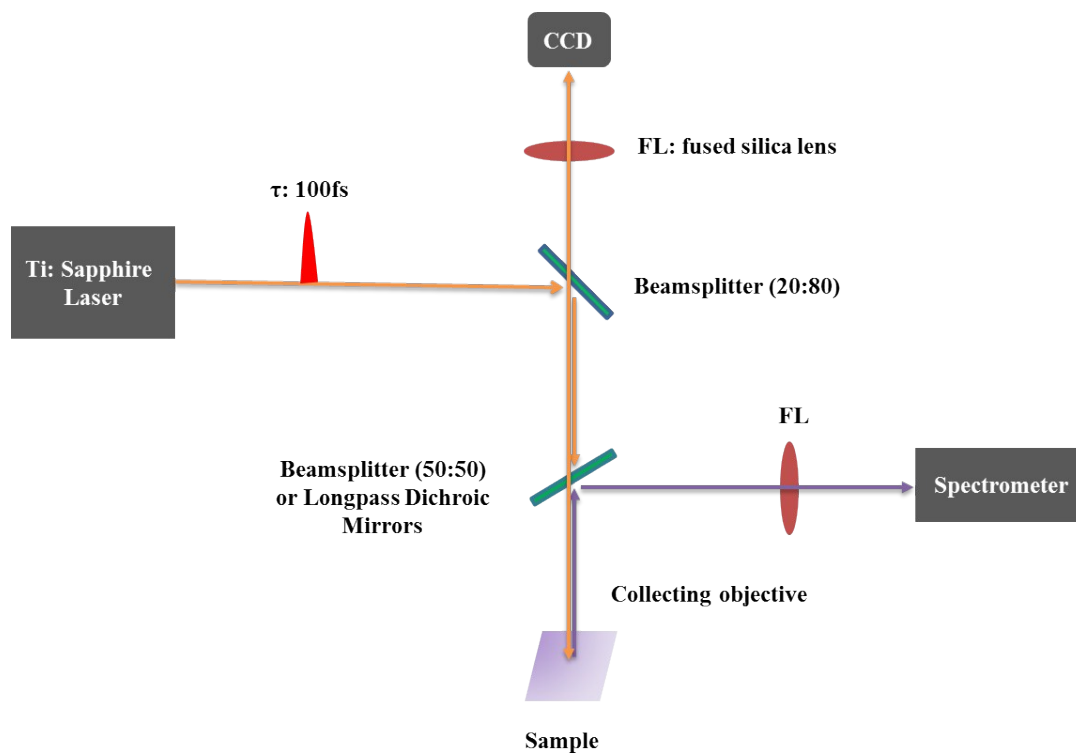

**Figure S1. Experimental setup for measuring SH spectra.**

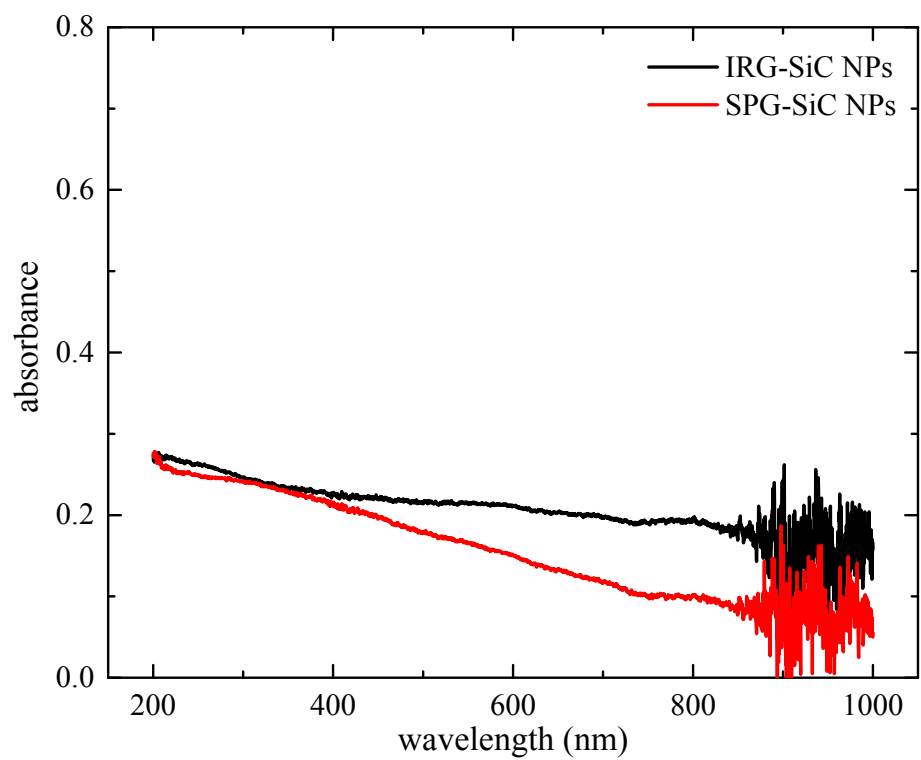

**Figure S2. Ultraviolet-visible (UV3150, Shimadzu, Japan) absorption spectrum of SiC NPs dispersed in deionized water (0.05mg / ml).**
